# Supplementary material for: Isomelezitose Overproduction by Alginate-Entrapped Recombinant E. coli Cells and In Vitro Evaluation of Its Potential Prebiotic Effect
Source: MDPI journal article supplement (doi:10.3390/ijms232012682), 2022-10-21
Supplement: s1 [file s1]

## SUPPLEMENTARY MATERIAL

### **Isomelezitose overproduction by alginate-entrapped recombinant *E. coli* cells and in-vitro evaluation of its potential prebiotic effect**

Martin Garcia-Gonzalez<sup>1</sup>, Fadia V. Cervantes<sup>2</sup>, Ricardo P. Ipiates<sup>3</sup>, Angeles de la Rubia<sup>3</sup>, Francisco J. Plou<sup>2</sup>, and Maria Fernandez-Lobato<sup>1\*</sup>

<sup>1</sup>Departamento de Biología Molecular, Instituto de Biología Molecular, Centro de Biología Molecular Severo Ochoa (CSIC-UAM), Universidad Autónoma de Madrid. C/ Nicolás Cabrera, 1, 28049 Madrid, Spain

<sup>2</sup> Instituto de Catálisis y Petroleoquímica, CSIC, 28049 Madrid, Spain

<sup>3</sup> Departamento de Ingeniería Química, Universidad Autónoma de Madrid (UAM). Campus de Cantoblanco 28049 Madrid, Spain

\* Corresponding author: Maria Fernandez-Lobato ([mfernandez@cbm.csic.es](mailto:mfernandez@cbm.csic.es))

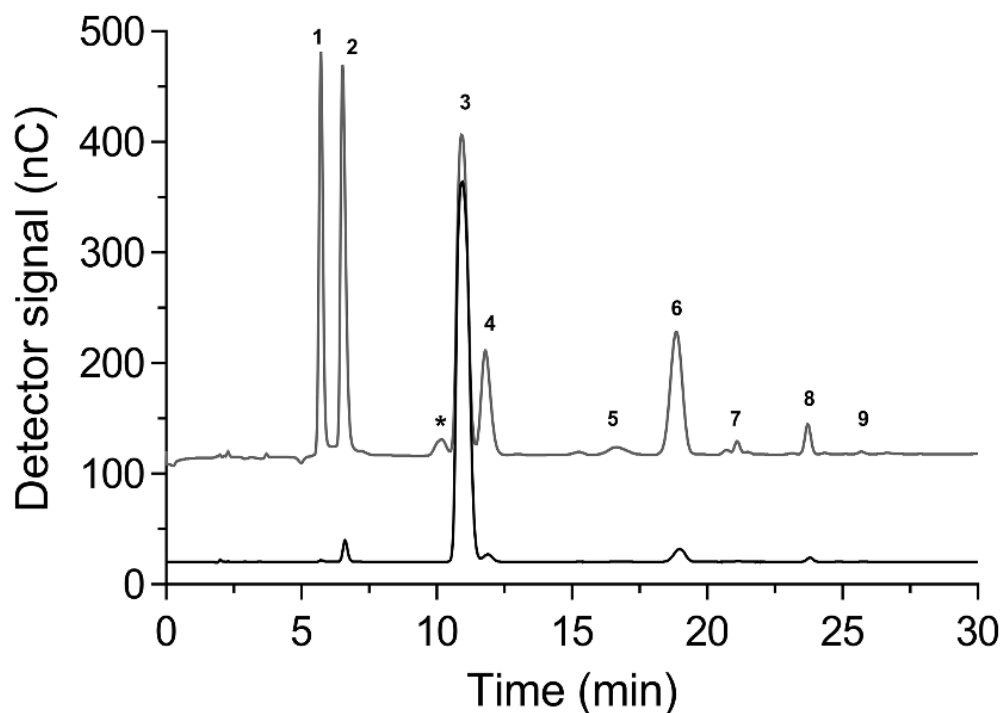

**Figure S1. Analysis of hetero-GlcOS production catalysed by alginate-entrapped *E. coli* [MrαGlu-pET28b(+)] cells.** HPAEC-PAD chromatograms of the reactions performed with not induced immobilized *E. coli* cells (black line) and with 1 mM IPTG induced cells (grey lines) are shown. Alginate-based biocatalyst with cells that were not induced with IPTG practically did not hydrolysed sucrose and so, the peaks corresponding to the transglucosylation products were negligible. Peak assignment: (1) D-glucose; (2) D-fructose; (3) sucrose; (4) trehalulose; (5) melezitose; (6) isomelezitose; (7) theanderose; (8) erlose; (9) esculosa; (\*) unknown product.

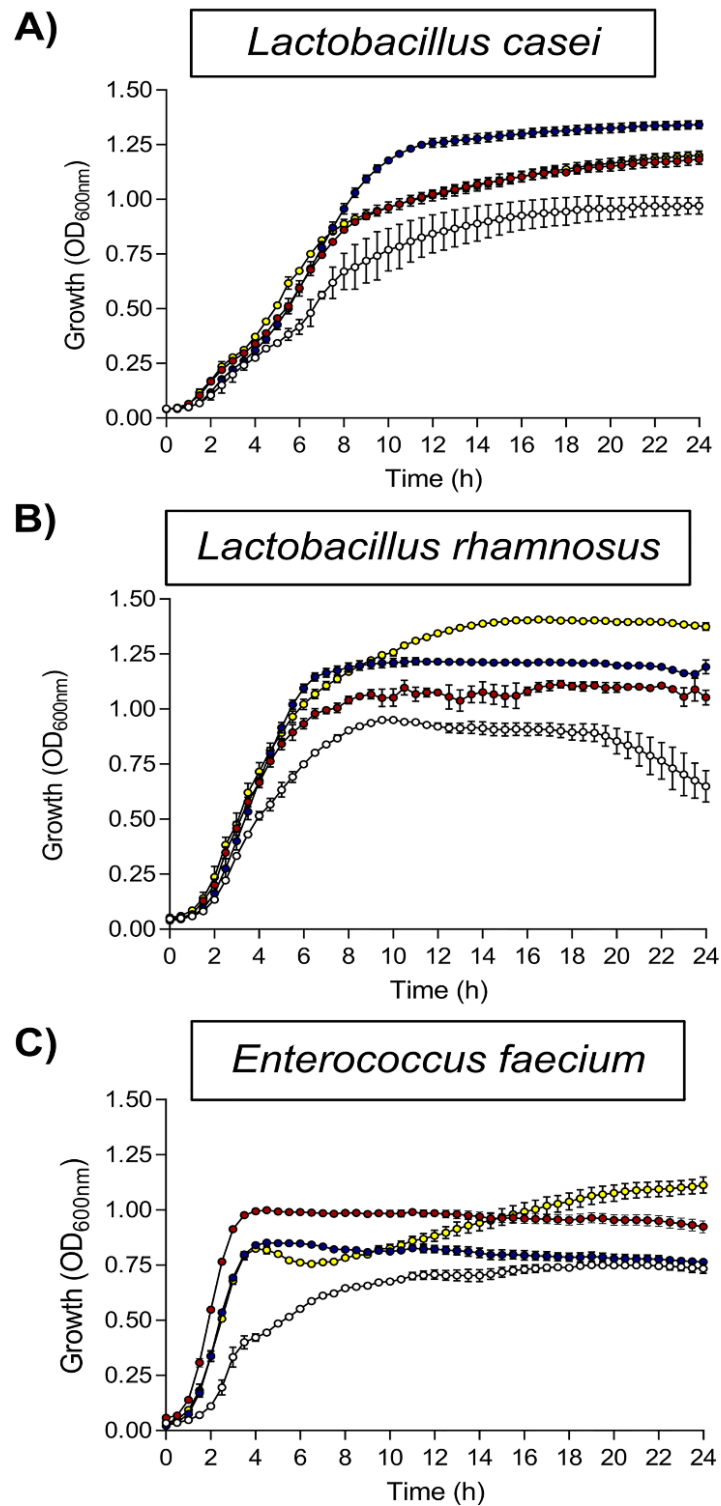

**Figure S2. Growth curves of the indicated probiotic bacteria.** Bacteria were cultured at 37 °C and under aerobic conditions in MRS medium with no carbon source (white circles), or supplemented with glucose, fructose and sucrose at the same concentration in the hetero-GlcOS mixture (yellow circles), 2.0% (w/v) “Actilight” FOS mixture (blue circles) or 2.0% (w/v) hetero-GlcOS mixture (green circles). Error bars represent the standard deviations from three independent analysis.

**Table S1.** Sugar composition of the reaction mixture treated with alginate-entrapped *Komagataella phaffii* cells.

| Carbohydrate<br>(% w/w) | Glucose | Fructose | Sucrose | Trehalulose | Isomelezitose | Rest of<br>hetero-<br>GlcOS |
|-------------------------|---------|----------|---------|-------------|---------------|-----------------------------|
| <b>Before</b>           | 18      | 25.5     | 13      | 19          | 15            | 9.5                         |
| <b>After</b>            | 1.2     | 0.6      | 22      | 33          | 26            | 17.2                        |

Reaction conditions: 30 h incubation with orbital shaking (200-250 rpm) at 30 °C.

**Table S2.** Composition of the commercial fructo-oligosaccharides mixture “Actilight” determined by HPAEC-PAD.

| Carbohydrate                | Concentration (% w/w) |
|-----------------------------|-----------------------|
| Glucose                     | 0.4                   |
| Fructose                    | 0.7                   |
| Sucrose                     | 11.1                  |
| 1-Kestose                   | 33.0                  |
| Neokestose                  | 2.3                   |
| Nystose                     | 35.6                  |
| Neonystose                  | 4.2                   |
| 1-Fructosylnystose          | 7.3                   |
| 1-Fructosylfructosylnystose | 3.3                   |
| Other FOS                   | 2.2                   |

The HPAEC-PAD method is described in Section 3.10 of *Materials and Methods*.
